# Supplementary material for: Compensatory Processes in Striatal Neurons Expressing the Tyrosine Hydroxylase Gene in Transgenic Mice in a Model of Parkinson’s Disease
Source: MDPI journal article supplement (doi:10.3390/ijms242216245), 2023-11-13
Supplement: s1 [file s1]

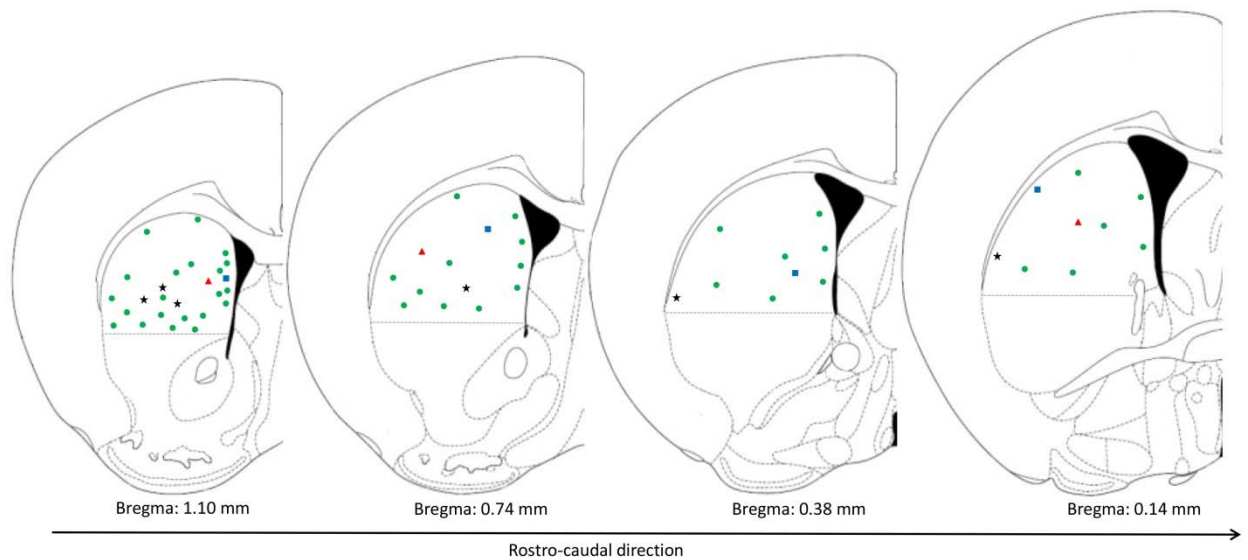

**Figure S1.** Schematic representation of the distribution in the rostro-caudal direction of the dorsal striatum of transgenic mice of neurons containing: GFP, TH-immunopositive and AADC-immunopositive materials (black asterisks); GFP and TH-immunopositive material but no AADC-immunopositive material (red triangles); GFP but without TH-immunopositive and AADC-immunopositive materials (green circles); TH-immunopositive material but without GFP and AADC-immunopositive material (blue squares).  $n = 1$ .

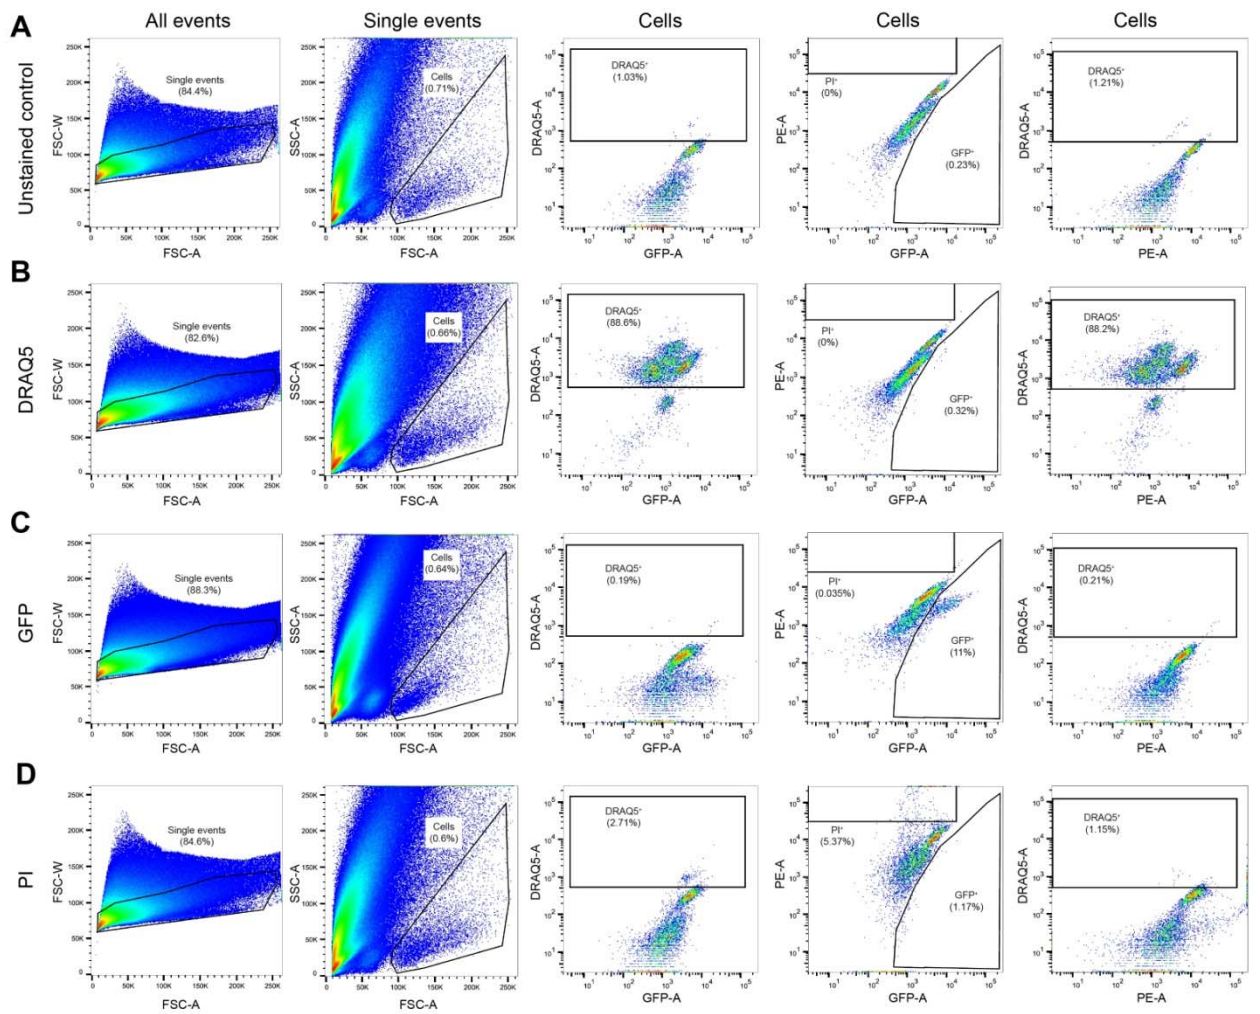

**Figure S2.** Unstained control and compensation controls for each fluorophore. (A) Unstained control. (B) Staining of cells with DRAQ5. (C) Staining of cells with GFP. (D) Staining of cells with PI. FSC, forward scatter; PE, phycoerythrin (detection channel); SSC, side scatter.
